# Supplementary material
Source: PubMed Central journal article supplement (PMC3340509)

Supplemental Figure 1. Association between hours of vigorous physical activity per week and fecundability among women with BMI < 25, fitted by restricted cubic splines. The reference level for the fecundability ratio is 0 hours/week. The curves are adjusted for cycle number, age, partner's age, BMI (continuous), alcohol consumption, pack-years of smoking, intercourse frequency, last method of contraception, and hours of moderate physical activity per week. There were 4 knots located at 0.5, 1, 2, and 3 hours/week.

Supplemental Figure 2. Association between hours of vigorous physical activity per week and fecundability among women with BMI  $\geq 25$ , fitted by restricted cubic splines. The reference level for the fecundability ratio is 0 hours/week. The curves are adjusted for cycle number, age, partner's age, BMI (continuous), alcohol consumption, pack-years of smoking, intercourse frequency, last method of contraception, and hours of moderate physical activity per week. There were 4 knots located at 0.5, 1, 2, and 3 hours/week.

Supplemental Table 1. Moderate physical activity and time to pregnancy, stratified by selected factors

| Characteristic                        | Moderate physical activity, hours per week |                   |                   |                   |                   |
|---------------------------------------|--------------------------------------------|-------------------|-------------------|-------------------|-------------------|
|                                       | <1                                         | 1                 | 2                 | 3-4               | ≥5                |
| Age at baseline, years:               |                                            |                   |                   |                   |                   |
| <30                                   |                                            |                   |                   |                   |                   |
| Pregnancies                           | 94                                         | 123               | 306               | 485               | 552               |
| Cycles                                | 650                                        | 875               | 1,903             | 2,824             | 3,352             |
| FR (95% CI) <sup>a</sup>              | 1.00 (ref.)                                | 0.86 (0.64, 1.16) | 1.05 (0.81, 1.36) | 1.11 (0.87, 1.43) | 1.07 (0.84, 1.38) |
| ≥30                                   |                                            |                   |                   |                   |                   |
| Pregnancies                           | 67                                         | 104               | 232               | 235               | 286               |
| Cycles                                | 500                                        | 668               | 1,370             | 1,459             | 1,624             |
| FR (95% CI) <sup>a</sup>              | 1.00 (ref.)                                | 1.22 (0.87, 1.72) | 1.32 (0.97, 1.78) | 1.20 (0.88, 1.62) | 1.34 (0.99, 1.81) |
| Parity:                               |                                            |                   |                   |                   |                   |
| Parous                                |                                            |                   |                   |                   |                   |
| Pregnancies                           | 82                                         | 101               | 217               | 239               | 285               |
| Cycles                                | 478                                        | 540               | 1,150             | 1,051             | 1,243             |
| FR (95% CI) <sup>a</sup>              | 1.00 (ref.)                                | 1.13 (0.81, 1.58) | 1.12 (0.84, 1.49) | 1.36 (1.02, 1.81) | 1.37 (1.03, 1.83) |
| Nulliparous                           |                                            |                   |                   |                   |                   |
| Pregnancies                           | 79                                         | 126               | 321               | 481               | 553               |
| Cycles                                | 672                                        | 1,003             | 2,123             | 3,232             | 3,733             |
| FR (95% CI) <sup>a</sup>              | 1.00 (ref.)                                | 0.98 (0.72, 1.33) | 1.23 (0.94, 1.62) | 1.14 (0.88, 1.48) | 1.15 (0.88, 1.49) |
| Body mass index (kg/m <sup>2</sup> ): |                                            |                   |                   |                   |                   |
| <25                                   |                                            |                   |                   |                   |                   |
| Pregnancies                           | 97                                         | 145               | 364               | 516               | 643               |
| Cycles                                | 618                                        | 889               | 2,101             | 3,047             | 3,661             |
| FR (95% CI) <sup>a</sup>              | 1.00 (ref.)                                | 1.02 (0.77, 1.36) | 1.11 (0.86, 1.43) | 1.10 (0.86, 1.41) | 1.17 (0.92, 1.49) |
| ≥25                                   |                                            |                   |                   |                   |                   |
| Pregnancies                           | 64                                         | 82                | 174               | 204               | 195               |
| Cycles                                | 532                                        | 654               | 1,172             | 1,236             | 1,315             |
| FR (95% CI) <sup>a</sup>              | 1.00 (ref.)                                | 0.99 (0.69, 1.42) | 1.22 (0.89, 1.67) | 1.27 (0.94, 1.77) | 1.20 (0.87, 1.65) |
| Cycle attempts before study entry:    |                                            |                   |                   |                   |                   |
| ≤2                                    |                                            |                   |                   |                   |                   |
| Pregnancies                           | 125                                        | 170               | 390               | 551               | 625               |
| Cycles                                | 783                                        | 1,115             | 2,247             | 3,015             | 3,464             |
| FR (95% CI) <sup>a</sup>              | 1.00 (ref.)                                | 0.88 (0.68, 1.15) | 1.02 (0.81, 1.28) | 1.06 (0.85, 1.32) | 1.06 (0.85, 1.32) |
| 3-6                                   |                                            |                   |                   |                   |                   |
| Pregnancies                           | 46                                         | 57                | 148               | 169               | 213               |
| Cycles                                | 367                                        | 428               | 1,026             | 1,268             | 1,512             |
| FR (95% CI) <sup>a</sup>              | 1.00 (ref.)                                | 1.46 (0.92, 2.30) | 1.58 (1.06, 2.36) | 1.45 (0.97, 2.15) | 1.59 (1.08, 2.36) |

Note: FR = fecundability ratio, CI = confidence interval.

<sup>a</sup>Adjusted for cycle number, age, partner's age, BMI, alcohol consumption, pack-years of smoking, intercourse frequency, last method of contraception, and vigorous PA.

Supplemental Table 2. Total physical activity and time to pregnancy, stratified by selected factors

| Characteristic                        | Total MET-hours of physical activity per week |                   |             |                   |                   |                   |                   |
|---------------------------------------|-----------------------------------------------|-------------------|-------------|-------------------|-------------------|-------------------|-------------------|
|                                       | <10                                           | 10-19             | 20-29       | 30-39             | 40-49             | 50-59             | ≥60               |
| Age at baseline, years:               |                                               |                   |             |                   |                   |                   |                   |
| <30                                   |                                               |                   |             |                   |                   |                   |                   |
| Pregnancies                           | 208                                           | 468               | 333         | 274               | 135               | 88                | 54                |
| Cycles                                | 1,395                                         | 2,897             | 1,897       | 1,611             | 998               | 438               | 368               |
| FR (95% CI) <sup>a</sup>              | 0.91 (0.75, 1.10)                             | 0.92 (0.79, 1.08) | 1.00 (ref.) | 0.95 (0.79, 1.14) | 0.75 (0.60, 0.93) | 1.11 (0.85, 1.45) | 0.78 (0.57, 1.07) |
| ≥30                                   |                                               |                   |             |                   |                   |                   |                   |
| Pregnancies                           | 166                                           | 316               | 200         | 130               | 66                | 30                | 16                |
| Cycles                                | 1,050                                         | 1,850             | 1,198       | 734               | 394               | 250               | 145               |
| FR (95% CI) <sup>a</sup>              | 1.01 (0.80, 1.28)                             | 1.00 (0.82, 1.23) | 1.00 (ref.) | 1.00 (0.78, 1.28) | 0.95 (0.69, 1.30) | 0.60 (0.40, 0.92) | 0.59 (0.34, 1.04) |
| Parity:                               |                                               |                   |             |                   |                   |                   |                   |
| Parous                                |                                               |                   |             |                   |                   |                   |                   |
| Pregnancies                           | 201                                           | 334               | 193         | 110               | 50                | 22                | 14                |
| Cycles                                | 1,027                                         | 1,641             | 834         | 499               | 240               | 125               | 96                |
| FR (95% CI) <sup>a</sup>              | 0.87 (0.69, 1.10)                             | 0.86 (0.70, 1.06) | 1.00 (ref.) | 0.90 (0.68, 1.18) | 0.80 (0.55, 1.15) | 0.67 (0.41, 1.10) | 0.61 (0.33, 1.12) |
| Nulliparous                           |                                               |                   |             |                   |                   |                   |                   |
| Pregnancies                           | 173                                           | 450               | 340         | 294               | 151               | 96                | 56                |
| Cycles                                | 1,418                                         | 3,106             | 2,261       | 1,846             | 1,152             | 563               | 417               |
| FR (95% CI) <sup>a</sup>              | 0.90 (0.74, 1.11)                             | 0.97 (0.83, 1.13) | 1.00 (ref.) | 1.01 (0.85, 1.20) | 0.84 (0.69, 1.04) | 1.07 (0.83, 1.38) | 0.81 (0.60, 1.11) |
| Body mass index (kg/m <sup>2</sup> ): |                                               |                   |             |                   |                   |                   |                   |
| <25                                   |                                               |                   |             |                   |                   |                   |                   |
| Pregnancies                           | 215                                           | 537               | 393         | 312               | 161               | 91                | 56                |
| Cycles                                | 1,257                                         | 3,051             | 2,286       | 1,742             | 1,077             | 478               | 425               |
| FR (95% CI) <sup>a</sup>              | 1.01 (0.84, 1.22)                             | 1.02 (0.88, 1.18) | 1.00 (ref.) | 1.02 (0.86, 1.20) | 0.84 (0.68, 1.03) | 1.07 (0.82, 1.38) | 0.71 (0.52, 0.96) |
| ≥25                                   |                                               |                   |             |                   |                   |                   |                   |
| Pregnancies                           | 159                                           | 247               | 140         | 92                | 40                | 27                | 14                |
| Cycles                                | 1,188                                         | 1,696             | 809         | 603               | 315               | 210               | 88                |
| FR (95% CI) <sup>a</sup>              | 0.76 (0.59-0.99)                              | 0.79 (0.63, 1.00) | 1.00 (ref.) | 0.81 (0.60, 1.08) | 0.75 (0.51, 1.11) | 0.64 (0.40-1.00)  | 0.96 (0.52, 1.77) |
| Cycle attempts before study entry:    |                                               |                   |             |                   |                   |                   |                   |
| ≤2                                    |                                               |                   |             |                   |                   |                   |                   |
| Pregnancies                           | 269                                           | 598               | 387         | 312               | 146               | 90                | 59                |
| Cycles                                | 1,697                                         | 3,297             | 2,147       | 1,684             | 917               | 513               | 369               |
| FR (95% CI) <sup>a</sup>              | 0.96 (0.80, 1.15)                             | 1.02 (0.88, 1.18) | 1.00 (ref.) | 1.00 (0.85, 1.19) | 0.84 (0.68, 1.04) | 0.91 (0.70, 1.18) | 0.82 (0.61, 1.11) |
| 3-6                                   |                                               |                   |             |                   |                   |                   |                   |
| Pregnancies                           | 105                                           | 186               | 146         | 92                | 55                | 28                | 11                |
| Cycles                                | 748                                           | 1,450             | 948         | 661               | 475               | 175               | 144               |
| FR (95% CI) <sup>a</sup>              | 0.95 (0.72, 1.27)                             | 0.83 (0.66, 1.06) | 1.00 (ref.) | 0.90 (0.67, 1.21) | 0.73 (0.52, 1.03) | 1.05 (0.67, 1.65) | 0.48 (0.25, 0.93) |

Note: FR = fecundability ratio, CI = confidence interval.

<sup>a</sup>Adjusted for cycle number, age, partner's age, BMI, alcohol consumption, pack-years of smoking, intercourse frequency, and last method of contraception.

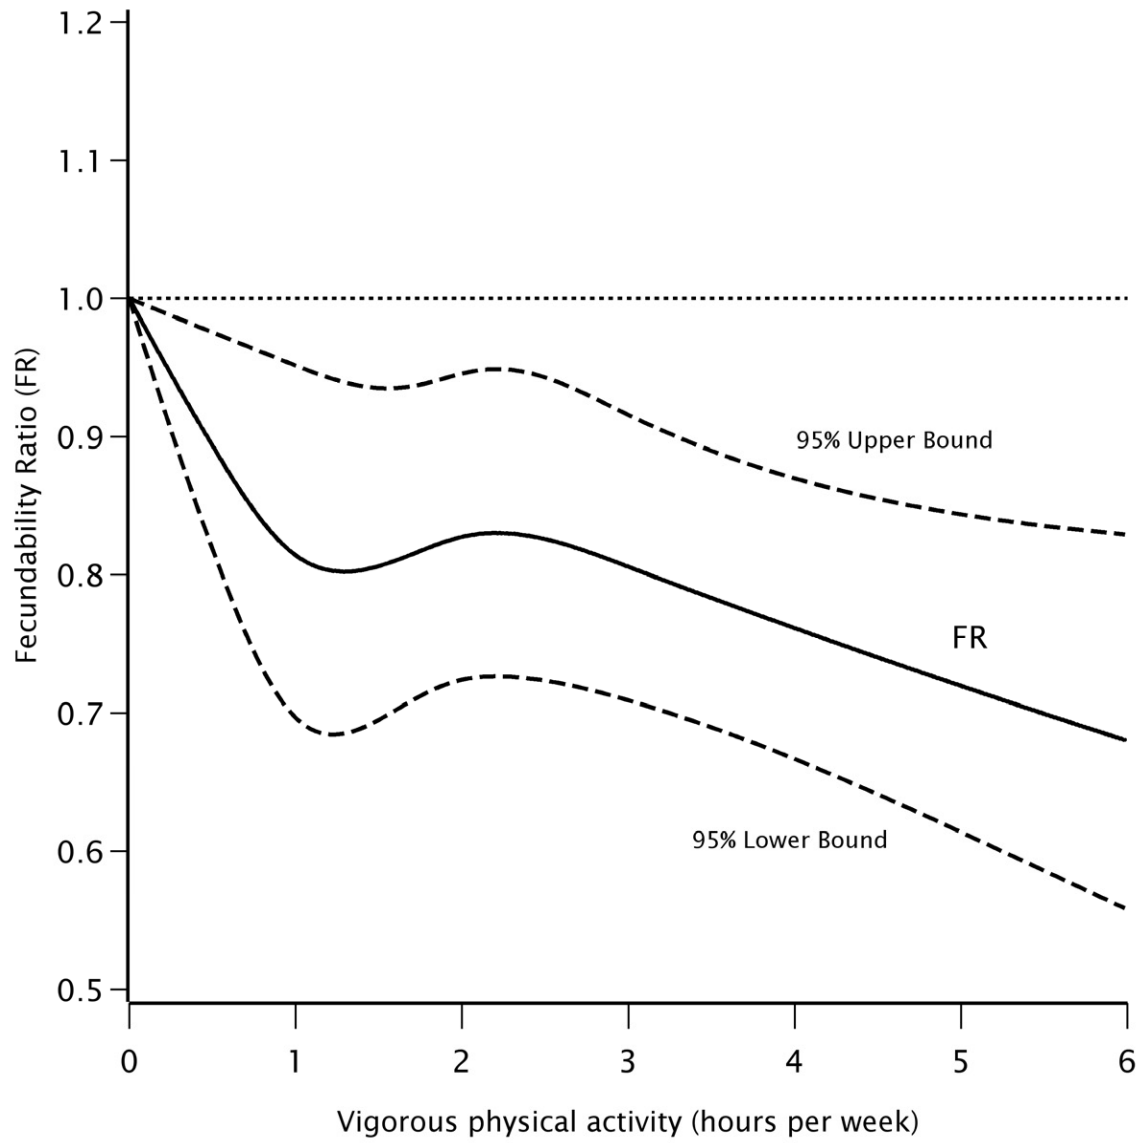

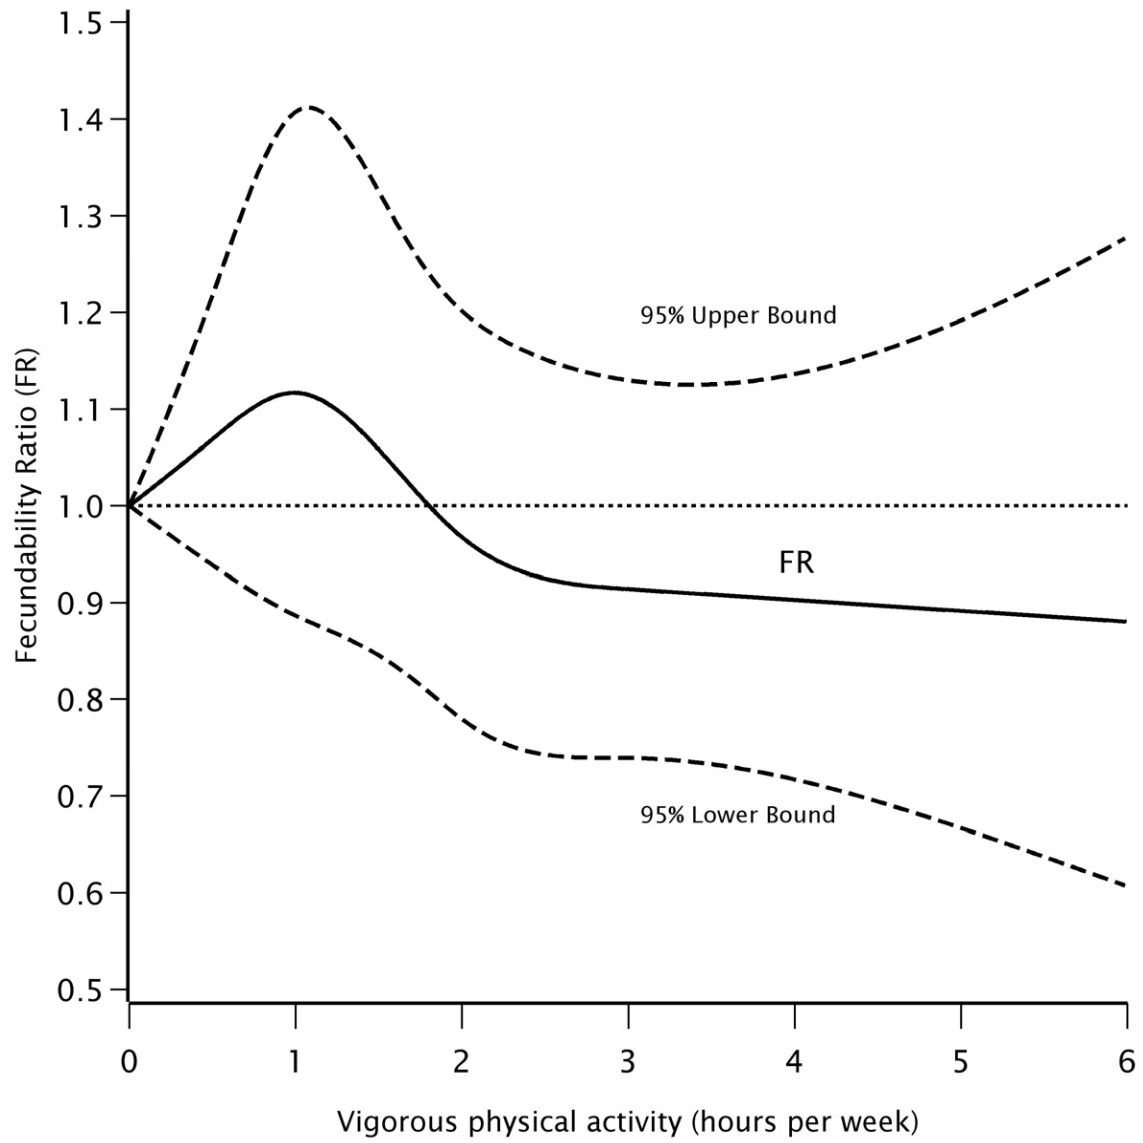

Supplement: NIHMS360162-supplement-01.pdf [file NIHMS360162-supplement-01.pdf]
